# The TNF-Alpha-238 Polymorphism and Cancer Risk: A Meta-Analysis

Ping Zhou<sup>1,3</sup>, Guo-Qiang Lv<sup>1</sup>, Jian-Zhong Wang<sup>2</sup>, Cheng-Wan Li<sup>2</sup>, Liang-Feng Du<sup>3</sup>, Chun Zhang<sup>1\*</sup>, Jian-Ping Li<sup>1\*</sup>

**1** Department of General Surgery, The Third Affiliated Hospital to Nantong University, Wuxi, China, **2** Institute of Integrated Traditional Chinese and Western Medicine, The Third Affiliated Hospital to Nantong University, Wuxi, China, **3** Department of Intensive Care Unit, The Third Affiliated Hospital to Nantong University, Wuxi, China

## Abstract

**Background and Objectives:** Tumor necrosis factor- $\alpha$  (TNF- $\alpha$ ) plays a very important role in the development and progress of cancer. Some TNF- $\alpha$  polymorphisms have been confirmed to increase cancer risks; however, the association between TNF- $\alpha$ -238 polymorphism and cancers remains controversial and ambiguous. The aim of this study is to explore a more precise estimation of its relationship with cancer using meta-analysis.

**Methods:** Electronic searches of several databases were conducted for all publications on the association between this variant and cancer through March 2011. Odds ratios (OR) with 95% confidence intervals (95% CI) were used to assess the strength of this association in the random-effect model.

**Results:** Thirty four studies with 34,679 cancer patients and 41,186 healthy controls were included. This meta-analysis showed no significant association between TNF- $\alpha$ -238 polymorphism and cancers (AA+GA vs GG: OR = 1.09, 95%CI = 0.88–1.34). In Caucasian and Asian subgroups, OR values (95% CI) were 1.14 (0.91–1.43) and 0.97 (0.58–1.61), respectively. In the subgroups of cancer type, no significant association was detected. The sensitivity analysis further strengthened the validity of these negative associations. No publication bias was observed in this study.

**Conclusions:** No significant association was found between the TNF- $\alpha$ -238 polymorphism and the risk for cancer.

**Citation:** Zhou P, Lv G-Q, Wang J-Z, Li C-W, Du L-F, et al. (2011) The TNF-Alpha-238 Polymorphism and Cancer Risk: A Meta-Analysis. PLoS ONE 6(7): e22092. doi:10.1371/journal.pone.0022092

**Editor:** Mike B. Gravenor, University of Swansea, United Kingdom

**Received:** March 30, 2011; **Accepted:** June 15, 2011; **Published:** July 19, 2011

**Copyright:** © 2011 Zhou et al. This is an open-access article distributed under the terms of the Creative Commons Attribution License, which permits unrestricted use, distribution, and reproduction in any medium, provided the original author and source are credited.

**Funding:** The authors have no support or funding to report.

**Competing Interests:** The authors have declared that no competing interests exist.

\* E-mail: wxszyzc@gmail.com (CZ); ljianping\_sy@126.com (J-PL)

## Introduction

Tumor necrosis factor- $\alpha$  (TNF- $\alpha$ ) is the most important pro-inflammatory cytokine involved in the growth, differentiation, cellular function and survival of many cells. It is produced by diverse kinds of cells, such as macrophages, neutrophils, fibroblasts, keratinocytes, NK cells, T and B cells, and tumor cells [1]. TNF- $\alpha$  has been reported to play an important role in the pathogenesis of cancer [2].

As transcription of TNF- $\alpha$  is regulated under genetic control, recent studies [3–5] have shown that its promoter polymorphisms at –238 (rs361525), –308 (rs1800629), –857 (rs1799724), and –1031 (rs1799964) positions could regulate TNF- $\alpha$  production. TNF- $\alpha$ -308 polymorphism has been confirmed as a risk factor for a range of cancers by meta-analysis, such as breast, gastric and hepatocellular cancers [6–8]. Jang et al [9] reported that TNF- $\alpha$ -238 polymorphism might play an apparently protective role against cancers. And many studies have focused on the relation of this polymorphism to different types of cancer [4,9–41]. However, an apparent discrepancy existed in the results. For the currently published studies only refer to a modest sample size and unified ethnicity, each of them might not achieve a reliable conclusion. Thus, we conducted this meta-analysis to combine the available studies [42].

## Publication search

Electronic databases (PubMed, EMBase, Cochrane Central Register of Controlled Trials and ISI Web of Science) were searched for all publications on the association between TNF- $\alpha$ -238 polymorphism and cancer through March 2011. The keywords were as follows: cancer/carcinoma, polymorphism/variant/genotype/SNP, and tumor necrosis factor/TNF- $\alpha$ . All the references of retrieved articles were also included as additional studies in this study. All the studies must meet the following criteria: (1) case-control study; (2) the outcome had to be cancer; and (3) at least two comparison groups (cancer group vs. control group).

## Data extraction

This meta-analysis included a total of 34 articles on TNF- $\alpha$ -238 and cancer. Two authors extracted the data independently and in duplicate. Items of the author's last name, year of publication, country of origin, source of the study population, genotypes and numbers of cases and controls and TNF- $\alpha$  genotyping method were extracted. The results were compared, disagreements were discussed, and consensus was reached. MOOSE Checklist and flow chart for the studies were shown as Checklist S1 and Figure S1.

## Statistical analysis

Review manager 5.0 was used to perform meta-analysis for TNF- $\alpha$ -238 polymorphisms (AA+GA versus GG genotype). The crude odds ratios (OR) and 95% CI were estimated for each study in a fixed- or random-effect model. Heterogeneity among studies were examined with  $I^2$  statistic interpreted as the proportion of total variation contributed by between-study variation. If there was a statistical difference in terms of heterogeneity ( $P < 0.05$ ), a random-effect model was selected to pool the data. A fixed-effect model, otherwise, was employed. Relative influence of each study on the pooled estimate was assessed by omitting one study at a time for sensitivity analysis. Funnel plots were used to evaluate publication bias. All  $P$ -values were two-tailed.

## Results

In this article, the association of TNF- $\alpha$ -238, -308 with cancer risk was investigated using meta-analysis in a range of populations. A total of 34 studies were identified to evaluate the relationship between TNF- $\alpha$ -238 polymorphism and risk for cancer. The detailed characteristics of the studies were shown in Table S1. 34,679 cancer patients and 41,186 healthy controls were included in this study. There were 9 studies for gastric cancer, 3 studies for breast cancer, 2 studies for lung cancer, 4 studies for hepatocellular carcinoma, 2 studies for myeloma, 2 studies for cervical cancer, 2 studies for oral cancer, 2 studies for prostate cancer, 2 studies for lymphoma and 5 studies for other 5 different cancers. Among those 34 studies, there were 16 Caucasus and 18 Asian studies, respectively.

As shown in Table 1, the OR for cancers (95% CI) in overall studies with AA+AG vs GG of TNF- $\alpha$ -238 polymorphism was 1.09 (0.88–1.34,  $P = 0.42$ ) (Table. 1). In Caucasian and Asian populations, ORs (95% CI) were 1.14 (0.91–1.43) and 0.97 (0.58–1.61), respectively. When stratified by the cancer type, the OR (95% CI) for gastric cancer was 1.22 (0.88–1.70) and for breast cancer being 1.13 (0.77–1.67); and similarly, values were 1.44 (0.82–2.52) and 0.99 (0.66–1.50) for hepatocellular carcinoma and other cancers. The forest plots of the meta-analysis were shown in Fig. 1.

Furthermore, according to the analysis, we found that there was evidence of heterogeneity in the association between TNF- $\alpha$ -238 polymorphism and risk for cancers among the overall 34 and stratified studies:  $I^2 = 77%$  in overall populations,  $I^2 = 75%$  in Caucasian populations and  $I^2 = 79%$  in Asian populations. A random-effect model was employed in the ORs calculation. To

further strengthen our findings, we conducted the sensitivity analysis. In the sensitivity analysis, there was little modification of the estimates after exclusion of individual study, with pooled ORs ranging from 1.02 to 1.13 for TNF- $\alpha$ -238 polymorphism.

The shape of the funnel plots was prone to be symmetrical, suggesting that there was no evidence of publication bias among the studies (Fig. 2). The results of this meta-analysis led to our conclusion that no significant association was manifested between TNF- $\alpha$ -238 polymorphism and the risk for cancers.

## Discussion

As inflammation has been assumed as a key factor involving in the pathogenesis of cancer, TNF- $\alpha$ , the most crucial inflammatory cytokine, has been implicated in both the development and progression through pathways of “the NF- $\kappa$ B and AP-1 transcription factor complexes activation” in experimental and human cancer studies [2,9]. Because A allele of TNF- $\alpha$  at -238 in the promoter region was found to down-regulate gene expression [5,22], studies on the relationship between this variant and cancers has been extensively investigated during recent decades [4,9–41]. However, results from these studies were ambiguous. To further provide insights into this debated subject, a meta-analysis is needed to achieve a more reliable and comprehensive conclusion.

To the best of our knowledge, we used meta-analysis to investigate the association between TNF- $\alpha$ -238 polymorphism and risk of cancers for the first time. With 34,679 cancer patients and 41,186 healthy controls included, this study had a greater power than all previous ones. We did not detect any significant association between TNF- $\alpha$ -238 polymorphism and cancer susceptibility in the overall population, with summary OR being 1.09 (0.88–1.34). Subgroup analyses stratified according to ethnicity and cancer type were also preformed, whilst with negative results acquired.

Because heterogeneity was found among the studies of overall and subgroups, random-effect model could be introduced to our analysis. Then, a sensitivity analysis was performed by removing one study for each time and re-running the model to determine the effect on the overall estimate. The estimates changed quite little, strengthening the results from this meta-analysis. Heterogeneity, however, still existed when each study was excluded in the sensitivity analysis, which indicated that population selection, cancer type and particular study were not the source of heterogeneity. Variability in frequency of this TNF- $\alpha$ -238 polymorphism among the populations or some unknown factors may be the source of heterogeneity. No publication bias was shown also suggesting this possible true result.

Several potential factors must be concerned with respects to the null association between TNF- $\alpha$ -238 polymorphism and cancers. First, cancer is a multi-factorial disease resulting from complex interactions between environmental and genetic factors [22]. It is possible that variants at this locus may have modest risks on cancers. Some environmental factors, however, may predominate in the development of cancer, such as living habits and exposure to carcinogens. Without considering these factors, it may lead to the failure to detect the role of TNF- $\alpha$ -238 polymorphism in cancer development. Second, some single-nucleotide polymorphisms of some cytokines, such as polymorphisms of interleukin-8-251, interleukin-10-819, transforming growth factor beta1-509 and TNF- $\alpha$ -308, may exert their complex and interacting functions with each other, which could affect the effects of TNF- $\alpha$ -238 polymorphism in the pathogenesis of cancer. Therefore, other polymorphisms as cancer risk factors should be taken into account to conclude a true effect. Third, this polymorphism might have

**Table 1.** Results of pooled ORs in the meta-analysis.

| Group          | N  | Case/control | OR (95% CI)     | P    |
|----------------|----|--------------|-----------------|------|
| Overall        | 34 | 34679/41186  | 1.09(0.88,1.34) | 0.42 |
| Cancer type    |    |              |                 |      |
| Gastric        | 9  | 1447/2633    | 1.22(0.88,1.70) | 0.23 |
| Breast         | 3  | 28443/29463  | 1.13(0.77,1.67) | 0.52 |
| Hepatocellular | 4  | 500/667      | 1.44(0.82,2.52) | 0.21 |
| Others         | 18 | 4289/8423    | 0.99(0.66,1.50) | 0.97 |
| Ethnicity      |    |              |                 |      |
| Caucasian      | 16 | 32165/38090  | 1.14(0.91,1.43) | 0.27 |
| Asian          | 18 | 2514/3096    | 0.97(0.58,1.61) | 0.89 |

doi:10.1371/journal.pone.0022092.t001

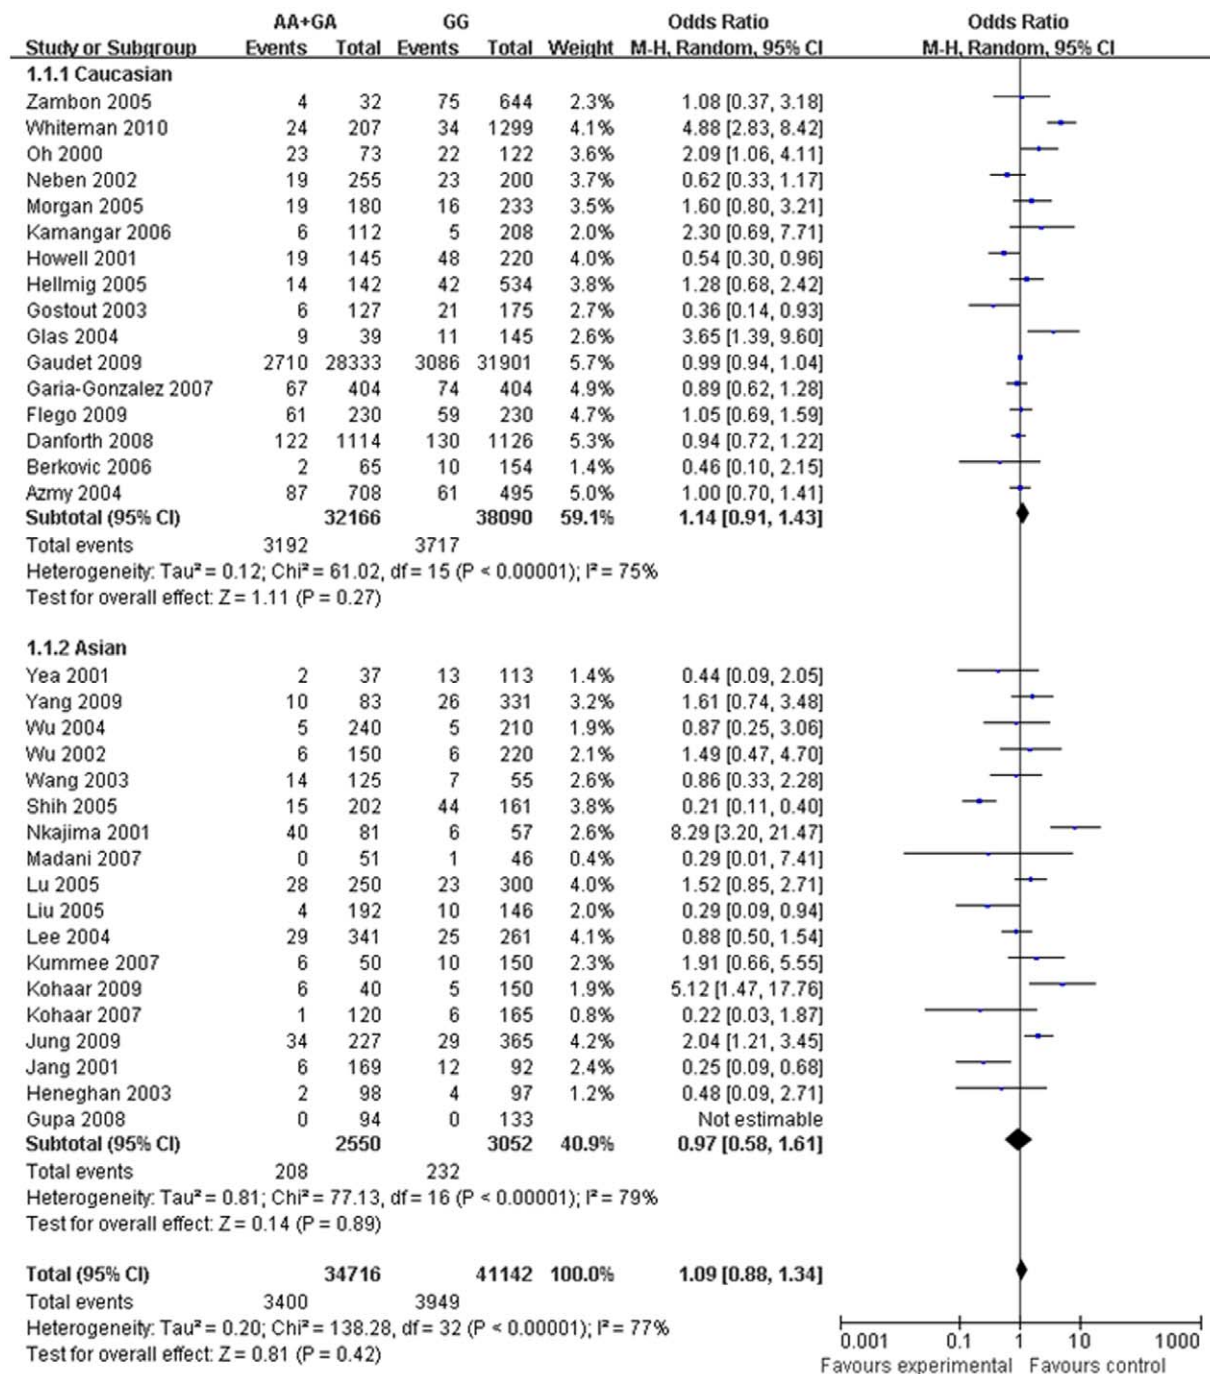

**Figure 1. ORs and 95% confidence interval (CI) of cancer according to TNF- $\alpha$ -238 polymorphism in 34 studies using random-effect model.** AA+GA, AA and GA genotypes of TNF- $\alpha$ -238 polymorphism; GG, GG genotype of TNF- $\alpha$ -238 polymorphism; ORs, odds ratios. doi:10.1371/journal.pone.0022092.g001

different effects on some certain types of cancers. For example, interleukin-6-174CC genotype was a risk factor on bladder cancer while tends to be a protector on colorectal cancer and gastric cancer [43]. However, the number of current studies of some particular cancer types is small, which means further investigations involving more cancer types are needed. Fourth, TNF- $\alpha$ -308 polymorphism is significantly linked with higher occurrences of TNF- $\alpha$ -producing autoimmune Major Histocompatibility Complex (MHC) haplotype HLA-A1, B8, DR3, which was already confirmed as a risk factor for cancers [44]. However, it is still unknown whether TNF-

$\alpha$ -238 polymorphism relates to MHC haplotype, which needs more investigation in the future. Thus, the lack of counting those factors above may affect the conclusions. This meta-analysis has pooled the available data from the case-control studies, which significantly increased statistical power. It cannot, however, overcome the above potentially critical factors.

In conclusion, no significant association was detected between TNF- $\alpha$ -238 polymorphism and cancers in this meta-analysis. Since the eligible case-control studies cannot provide a causal association, large well-designed cohort studies in the susceptibility of

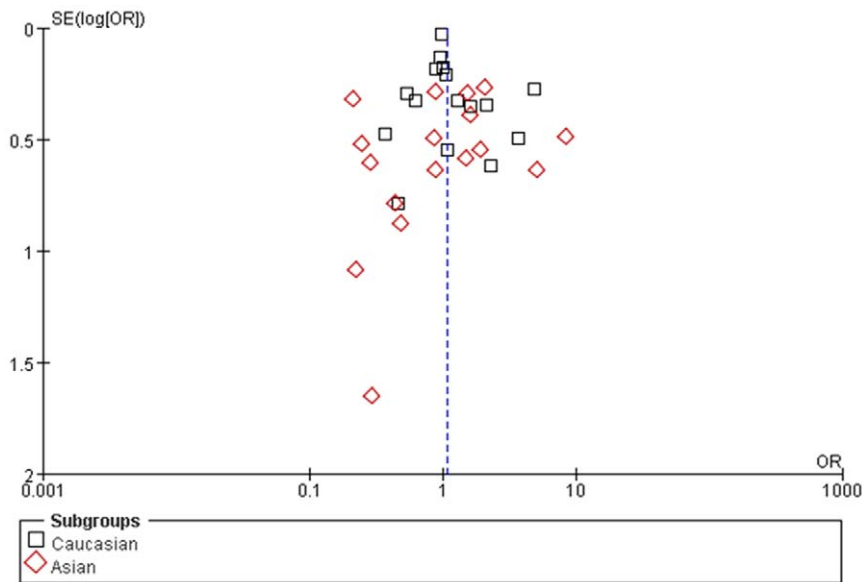

**Figure 2. Funnel plots analysis to detect publication bias.** Each point represents an independent study for the indicated association. doi:10.1371/journal.pone.0022092.g002

different types of cancer warrant to confirm this association in the future.

## Supporting Information

**Figure S1** The flow chart of the included studies. (DOC)

**Table S1** (DOC)

## References

- Anderson GM, Nakada MT, DeWitte M (2004) Tumor necrosis factor-alpha in the pathogenesis and treatment of cancer. *Curr Opin Pharmacol* 4: 314–320.
- Wang SS, Purdue MP, Cerhan JR, Zheng T, Menashe I, et al. (2009) Common gene variants in the tumor necrosis factor (TNF) and TNF receptor superfamilies and NF-kB transcription factors and non-Hodgkin lymphoma risk. *PLoS One* 4: e5360.
- Huizinga TW, Westendorp RG, Bollen EL, Keijsers V, Brinkman BM, et al. (1997) TNF-alpha promoter polymorphisms, production and susceptibility to multiple sclerosis in different groups of patients. *J Neuroimmunol* 72: 149–153.
- Hellmig S, Fischbach W, Goebeler-Kolve ME, Folsch UR, Hampe J, et al. (2005) A functional promoter polymorphism of TNF-alpha is associated with primary gastric B-Cell lymphoma. *Am J Gastroenterol* 100: 2644–2649.
- Lindholm E, Bakhtadze E, Cilio C, Agardh E, Groop L, et al. (2008) Association between LTA, TNF and AGER polymorphisms and late diabetic complications. *PLoS One* 3: e2546.
- Shen C, Sun H, Sun D, Xu L, Zhang X, et al. (2010) Polymorphisms of tumor necrosis factor-alpha and breast cancer risk: a meta-analysis. *Breast Cancer Res Treat*.
- Lu PH, Tang Y, Li C, Shen W, Ji L, et al. (2010) [Meta-analysis of association of tumor necrosis factor alpha-308 gene promoter polymorphism with gastric cancer]. *Zhonghua Yu Fang Yi Xue Za Zhi* 44: 209–214.
- Yang Y, Luo C, Feng R, Bi S (2010) The TNF-alpha, IL-1B and IL-10 polymorphisms and risk for hepatocellular carcinoma: a meta-analysis. *J Cancer Res Clin Oncol*.
- Jang WH, Yang YI, Yea SS, Lee YJ, Chun JH, et al. (2001) The -238 tumor necrosis factor-alpha promoter polymorphism is associated with decreased susceptibility to cancers. *Cancer Lett* 166: 41–46.
- Yea SS, Yang YI, Jang WH, Lee YJ, Bae HS, et al. (2001) Association between TNF-alpha promoter polymorphism and Helicobacter pylori cagA subtype infection. *J Clin Pathol* 54: 703–706.
- Zamboni CF, Basso D, Navaglia F, Belluco C, Falda A, et al. (2005) Pro- and anti-inflammatory cytokines gene polymorphisms and Helicobacter pylori infection: interactions influence outcome. *Cytokine* 29: 141–152.
- Yang JJ, Ko KP, Cho LY, Shin A, Gwak J, et al. (2009) The role of TNF genetic variants and the interaction with cigarette smoking for gastric cancer risk: a nested case-control study. *BMC Cancer* 9: 238.
- Wu MS, Huang SP, Chang YT, Shun CT, Chang MC, et al. (2002) Tumor necrosis factor-alpha and interleukin-10 promoter polymorphisms in Epstein-Barr virus-associated gastric carcinoma. *J Infect Dis* 185: 106–109.
- Wu MS, Chen LT, Shun CT, Huang SP, Chiu HM, et al. (2004) Promoter polymorphisms of tumor necrosis factor-alpha are associated with risk of gastric mucosa-associated lymphoid tissue lymphoma. *Int J Cancer* 110: 695–700.
- Whiteman DC, Parmar P, Fahey P, Moore SP, Stark M, et al. (2010) Association of Helicobacter pylori infection with reduced risk for esophageal cancer is independent of environmental and genetic modifiers. *Gastroenterology* 139: 73–83. quiz e11–72.
- Gupta R, Sharma SC, Das SN (2008) Association of TNF-alpha and TNFR1 promoters and 3' UTR region of TNFR2 gene polymorphisms with genetic susceptibility to tobacco-related oral carcinoma in Asian Indians. *Oral Oncol* 44: 455–463.
- Gostout BS, Poland GA, Calhoun ES, Sohni YR, Giuntoli RL, 2nd, et al. (2003) TAP1, TAP2, and HLA-DR2 alleles are predictors of cervical cancer risk. *Gynecol Oncol* 88: 326–332.
- García-González MA, Savelkoul PH, Benito R, Santolaria S, Crusius JB, et al. (2005) No allelic variant associations of the IL-1 and TNF gene polymorphisms in the susceptibility to duodenal ulcer disease. *Int J Immunogenet* 32: 299–306.
- Flego V, Radojčić Badovinac A, Bulat-Kardum L, Matanić D, Crnić-Martinović M, et al. (2009) Primary lung cancer and TNF-alpha gene polymorphisms: a case-control study in a Croatian population. *Med Sci Monit* 15: CR361–365.
- Berkovic M, Cacev T, Zjajic-Rotkovic V, Kapitanovic S (2006) TNF-alpha promoter single nucleotide polymorphisms in gastroenteropancreatic neuroendocrine tumors. *Neuroendocrinology* 84: 346–352.
- Azmy IA, Balasubramanian SP, Wilson AG, Stephenson TJ, Cox A, et al. (2004) Role of tumour necrosis factor gene polymorphisms (-308 and -238) in breast cancer susceptibility and severity. *Breast Cancer Res* 6: R395–400.
- Shih CM, Lee YL, Chiou HL, Chen W, Chang GC, et al. (2006) Association of TNF-alpha polymorphism with susceptibility to and severity of non-small cell lung cancer. *Lung Cancer* 52: 15–20.
- Oh BR, Sasaki M, Perinchery G, Ryu SB, Park YI, et al. (2000) Frequent genotype changes at -308, and 488 regions of the tumor necrosis factor-alpha (TNF-alpha) gene in patients with prostate cancer. *J Urol* 163: 1584–1587.

24. Neben K, Mytilineos J, Mochler TM, Preiss A, Kraemer A, et al. (2002) Polymorphisms of the tumor necrosis factor-alpha gene promoter predict for outcome after thalidomide therapy in relapsed and refractory multiple myeloma. *Blood* 100: 2263–2265.
25. Nakajima K, Sasaki M, Nojima D, Oh BR, Ishii N, et al. (2001) Tumor necrosis factor-alpha gene mutations and genotype changes in renal cell carcinoma. *J Urol* 165: 612–615.
26. Morgan GJ, Adamson PJ, Mensah FK, Spink CF, Law GR, et al. (2005) Haplotypes in the tumour necrosis factor region and myeloma. *Br J Haematol* 129: 358–365.
27. Madani S, Noorinayer B, Madani H, Sadrolhefazi B, Molanayee S, et al. (2008) No association between TNF-alpha-238 polymorphism and colorectal cancer in Iranian patients. *Acta Oncol* 47: 473–474.
28. Liu CJ, Wong YK, Chang KW, Chang HC, Liu HF, et al. (2005) Tumor necrosis factor-alpha promoter polymorphism is associated with susceptibility to oral squamous cell carcinoma. *J Oral Pathol Med* 34: 608–612.
29. Lee SG, Kim B, Yook JH, Oh ST, Lee I, et al. (2004) TNF/LTA polymorphisms and risk for gastric cancer/duodenal ulcer in the Korean population. *Cytokine* 28: 75–82.
30. Kummee P, Tangkijvanich P, Poovorawan Y, Hirankarn N (2007) Association of HLA-DRB1\*13 and TNF-alpha gene polymorphisms with clearance of chronic hepatitis B infection and risk of hepatocellular carcinoma in Thai population. *J Viral Hepat* 14: 841–848.
31. Kohaar I, Tiwari P, Kumar R, Nasare V, Thakur N, et al. (2009) Association of single nucleotide polymorphisms (SNPs) in TNF-LTA locus with breast cancer risk in Indian population. *Breast Cancer Res Treat* 114: 347–355.
32. Kamangar F, Abnet CC, Hutchinson AA, Newschaffer CJ, Helzlsouer K, et al. (2006) Polymorphisms in inflammation-related genes and risk of gastric cancer (Finland). *Cancer Causes Control* 17: 117–125.
33. Heneghan MA, Johnson PJ, Clare M, Ho S, Harrison PM, et al. (2003) Frequency and nature of cytokine gene polymorphisms in hepatocellular carcinoma in Hong Kong Chinese. *Int J Gastrointest Cancer* 34: 19–26.
34. Glas J, Torok HP, Schneider A, Brunner G, Kopp R, et al. (2004) Allele 2 of the interleukin-1 receptor antagonist gene is associated with early gastric cancer. *J Clin Oncol* 22: 4746–4752.
35. Gaudet MM, Milne RL, Cox A, Camp NJ, Goode EL, et al. (2009) Five polymorphisms and breast cancer risk: results from the Breast Cancer Association Consortium. *Cancer Epidemiol Biomarkers Prev* 18: 1610–1616.
36. Danforth KN, Rodriguez C, Hayes RB, Sakoda LC, Huang WY, et al. (2008) TNF polymorphisms and prostate cancer risk. *Prostate* 68: 400–407.
37. Wang Y, Kato N, Hoshida Y, Yoshida H, Taniguchi H, et al. (2003) Interleukin-1beta gene polymorphisms associated with hepatocellular carcinoma in hepatitis C virus infection. *Hepatology* 37: 65–71.
38. Lu W, Pan K, Zhang L, Lin D, Miao X, et al. (2005) Genetic polymorphisms of interleukin (IL)-1B, IL-1RN, IL-8, IL-10 and tumor necrosis factor {alpha} and risk of gastric cancer in a Chinese population. *Carcinogenesis* 26: 631–636.
39. Kohaar I, Thakur N, Salhan S, Batra S, Singh V, et al. (2007) TNFalpha-308G/A polymorphism as a risk factor for HPV associated cervical cancer in Indian population. *Cell Oncol* 29: 249–256.
40. Jung KW, Ha E, Yu GI, Kim SJ, Chung WJ, et al. (2009) TNFalpha promoter polymorphism is a risk factor for susceptibility in hepatocellular carcinoma in Korean population. *Clin Chim Acta* 407: 16–19.
41. Howell WM, Turner SJ, Collins A, Bateman AC, Theaker JM (2002) Influence of TNFalpha and LTalpha single nucleotide polymorphisms on susceptibility to and prognosis in cutaneous malignant melanoma in the British population. *Eur J Immunogenet* 29: 17–23.
42. Zhu W, Wei BB, Shan X, Liu P (2010) -765G>C and 8473T>C polymorphisms of COX-2 and cancer risk: a meta-analysis based on 33 case-control studies. *Mol Biol Rep* 37: 277–288.
43. Xu B, Niu XB, Wang ZD, Cheng W, Tong N, et al. (2010) IL-6 -174G>C polymorphism and cancer risk: a meta-analysis involving 29,377 cases and 37,739 controls. *Mol Biol Rep*.
44. Elahi MM, Asotra K, Matata BM, Mastana SS (2009) Tumor Necrosis Factor Alpha-308 Gene Locus Promoter Polymorphism: An Analysis of Association with Health and Disease. *Biochim Biophys Acta*.
